# Supplementary material for: Identification of cancer-associated missense mutations in hace1 that impair cell growth control and Rac1 ubiquitylation
Source: PubMed Central journal article supplement (PMC5357957; doi:10.1038/srep44779), 2017-03-20

# **Identification of cancer-associated missense mutations in *hace1* that impair cell growth control and Rac1 ubiquitylation**

## **Author list**

Emilie Andrio, Romain Lotte, Daniel Hamaoui, Jacqueline Cherfils, Anne Doye, Mads Daugaard, Poul H. Sorensen, Frédéric Bost, Raymond Ruimy, Amel Mettouchi and Emmanuel Lemichez

## **Supplementary information**

### **Supplementary Figure S1: Control of HA-HACE1 mutant expression**

(a) Expression of HA-tagged HACE1 WT and mutants in MCF-12A cell lines was controlled by immunoblots anti-HA (IB: HA). (b) Impact of expression of HA-HACE1 WT and M114V, G175S, G175C and A204T mutants on Rac protein level in MCF-12A cell lines. Proteins were detected by immunoblotting anti-HA and anti-Rac. Graph shows quantification of Rac signals normalized to GAPDH and expressed as fold changes to vector. (c) Expression of HA-tagged HACE1 WT and mutants in MCF7 cell lines was controlled by immunoblots anti-HA. (a-c) Immunoblot anti-GAPDH on total cell lysates was performed as loading control.

### **Supplementary Figure S2: Efficiency of Rac1 ubiquitylation by HACE1 G175N**

Immunoblots showing levels of ubiquitylation of Rac1 Q61L catalyzed by HACE1 WT, G175S and G175N mutants. Precipitated His<sub>6</sub>-tagged ubiquitylated proteins (HisP) were immunoblotted anti-HA to reveal Rac1 Q61L ubiquitylation profiles. Immunoblots anti-HA and anti-myc on total cell lysates show protein expression and anti-actin is used as loading control. Each value corresponds to mean of three independent measurements analyzed by unpaired t-test with \* $p \leq 0.05$  or non-significant (ns).

### **Supplementary Figure S3: Ability of HACE1 V140A to control cell proliferation**

(a) Graphs show kinetics of cell proliferation. MCF-12A cell lines expressing HA-HACE1 wild-type or V140A. Each value corresponds to mean values of two independent experiments with technical quadruplicate analyzed by one-way ANOVA Dunnett's multiple comparison test with \*\*\* $p \leq 0.0003$ , \* $p \leq 0.015$  or non-significant (ns).

(b) Immunoblot anti-HA show HACE1 WT and V140A expression.

### **Supplementary Figure S4: Rac1 association with HACE1 mutants**

Association of myc-Rac1 Q61L with HA-tagged HACE1 wild-type (WT) and mutants was assessed by immunoprecipitation anti-myc (IP: myc) followed by immunoblots anti-HA (IB: HA) in HEK293 cells. Immunoblot anti-myc (IB: myc) shows levels of immunoprecipitated Rac1. Immunoblots on total lysates (Total) show expression of constructs.

### **Supplementary Figure S5: Binding of HACE1 domains to active Rac1**

Association of HACE1 domains described in the panel with either Flag-Rac1 Q61L (active) or Flag-Rac1 T17N (inactive) assessed by immunoprecipitation anti-Flag (IP: Flag) followed by immunoblots anti-HA (IB: HA). Cells were co-transfected with expression vectors of Flag-Rac1 Q61L or T17N and various HA-tagged HACE1 constructs. Immunoblots anti-Flag (IB: Flag) show levels of immunoprecipitated Rac1. Immunoblots on total lysate show expression of constructs.

### **Supplementary Figure S6: Cancer-associated mutations in ANK domain**

Histogram of repartition of cancer-associated missense mutations in each ankyrin repeat 1 to 7. Analysis conducted on data sets from the COSMIC version 79.

**Supplementary Table 1: Cancer-associated somatic mutations in HACE1 1-545**

| <b>Mutation<br/>(Amino acid)</b> | <b>Mutation<br/>(DNA)</b> | <b>Domain of<br/>HACE1</b> | <b>Primary tissue/<br/>Histopathological<br/>type of cancer</b> | <b>References</b> |
|----------------------------------|---------------------------|----------------------------|-----------------------------------------------------------------|-------------------|
| <b>K111N</b>                     | G333T                     | ANK                        | Large intestine/carcinoma                                       | 19                |
| <b>M114V</b>                     | A340G                     | ANK                        | Ovary/carcinoma                                                 | 19,28             |
| <b>A162V</b>                     | C485T                     | ANK                        | Ovary/carcinoma                                                 | 19,28             |
| <b>G175C</b>                     | G523T                     | ANK                        | Lung/carcinoma                                                  | 19                |
| <b>G175S</b>                     | G523A                     | ANK                        | Skin/carcinoma                                                  | 19,29             |
| <b>A204T</b>                     | G610A                     | ANK                        | Large intestine/carcinoma                                       | 19                |
| <b>Y251H</b>                     | T751C                     | ANK                        | Large intestine/carcinoma                                       | 19                |
| <b>H252N</b>                     | C754A                     | ANK                        | Ovary/carcinoma                                                 | 19,28             |
| <b>T263A</b>                     | A787G                     | MID                        | Large intestine/carcinoma                                       | 19,30             |
| <b>R332Q</b>                     | G995A                     | MID                        | Large intestine/carcinoma                                       | 19,31             |
| <b>R353G</b>                     | A1057G                    | MID                        | Large intestine/carcinoma                                       | 19,30             |
| <b>P359S</b>                     | C1075T                    | MID                        | Pancreas/carcinoma                                              | 19,32             |
| <b>R493I</b>                     | G1478T                    | MID                        | Large intestine/carcinoma                                       | 19,30             |

**Supplementary Table 2: Sequence of the primers used to generate HACE1 mutants**

| Mutation<br>Amino acid | Mutation<br>DNA | Forward primers<br>(5'-3' sequence)                                | Reverse primers<br>(5'-3' sequence)                              |
|------------------------|-----------------|--------------------------------------------------------------------|------------------------------------------------------------------|
| HACE K111N             | G333T           | tggcagcaagaaatgggcaga<br>ataaatgtatgagtaaattattaga                 | tctaataattactcatacatttattctgcc<br>catttctgtctgcca                |
| HACE1 M114V            | A340G           | ctaataattactcacacatttctct<br>gccatttctgtctgcc                      | ggcagcaagaaatgggcagaagaa<br>atgtgtgagtaaattattag                 |
| HACE1 V140A            | T419C           | acattggctggctgcaaatgggc<br>ggacag                                  | catgttgctgccagaacaatcacaa<br>gacgacagtga                         |
| HACE1 V140L            | G418T           | acagcaatacattggctggctttg<br>aatgggcgga                             | tccgccattcaaagccagccaatgt<br>attgctgt                            |
| HACE1 A162V            | C485T           | gttgatgttgaggatgtcatgggg<br>cagacagca                              | tgctgtctgccccatgacatcctcaaca<br>tcaac                            |
| HACE1 Q173A            | C517G, A518C    | cgcttctgtaccggtcgcgaggc<br>aacatgcag                               | tgcattgtcctgcggaacggtcaca<br>agacg                               |
| HACE1 N174A            | A520G, A521C    | tgctgtctgtgaccggcctggca<br>ggcaacatgc                              | gcatgttgctgccaggccggtcaca<br>agacgaca                            |
| HACE1 G175C            | G523T           | gttgctgccagaactgtcacaa<br>gacgacag                                 | ctgtctgtgtgacagttctggcaggc<br>aac                                |
| HACE1 G175N            | G522A, G523A    | tgactgtctgtgattgttctgg<br>caggcaacatg                              | catgttgctgccagaacaatcacaa<br>gacgacagtga                         |
| HACE1 G175S            | G523A           | ctgtctgtgtgactgttctggcag<br>gcaac                                  | gttgctgccagaacagtcacaagac<br>gacag                               |
| HACE1 A204T            | G610A           | caggagcaactccattgtacttta<br>cttgacatcatgg                          | ccatgactgcaagtaagtaaatgg<br>agttgctcctg                          |
| HACE1 Y251H            | T751C           | aagcctcgggtgatgtgaattaat<br>acttcacaagtctctc                       | gagagactgtgaagtattaattcaac<br>atcaccggaggctt                     |
| HACE1 H252N            | C754A           | gaaaaagcctcgggtatattgaa<br>taatacttcacaagtctctc                    | gagagactgtgaagtattaattcaata<br>taaccggaggcttttc                  |
| HACE1 T263A            | G787A           | ttcagactattattcaaatggcac<br>agaatgaagacctccgag                     | ctcggaggcttctcattctgtgccattga<br>ataatagtctgaaa                  |
| HACE1 R332Q            | G995A           | gggaggatggaccaatttga<br>gacgtgacaaaac                              | gtttgtcacgtcttcaaattgtccatc<br>ctccc                             |
| HACE1 R353G            | A1057G          | aatgggaataaaaactccaggaa<br>gccagggttcaagc                          | gctgaacacctggcttctggagtttta<br>ttccatt                           |
| HACE1 P359S            | C1075T          | gtgccaaagcaattccagactctt<br>gaacacctggcttctt                       | aagaagccagggttcaagagtctgg<br>aattgcttggcac                       |
| HACE1 R493I            | G1478T          | tctgcaaacatgatgaagttttaa<br>atgctttgtaataataatcccaa<br>attatattgac | gtcaaataaatttgggatttataaac<br>aaagcattttaaacttcatcatgttgc<br>aga |



**a**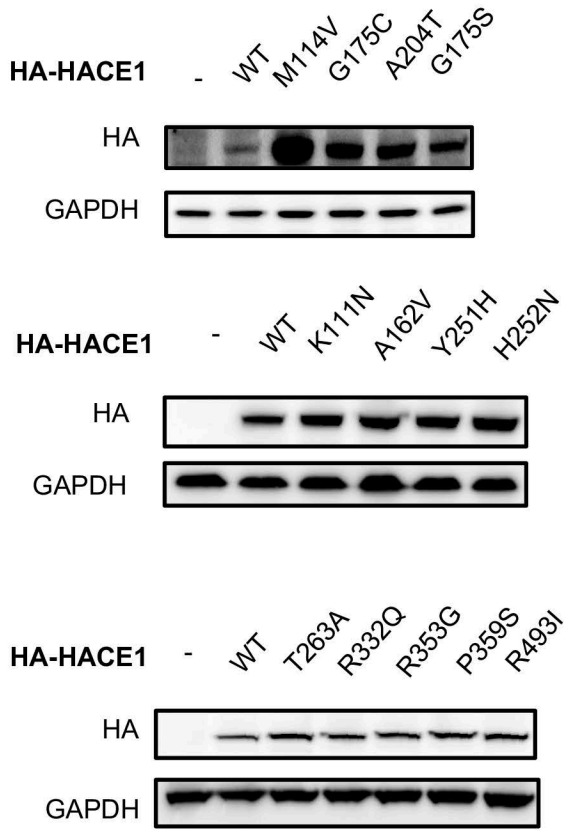**b**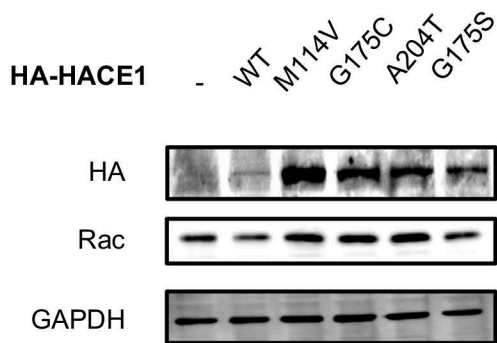**c**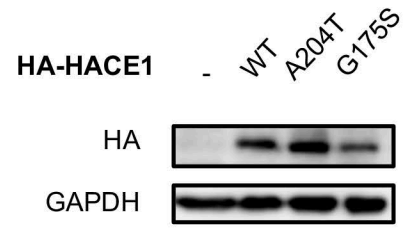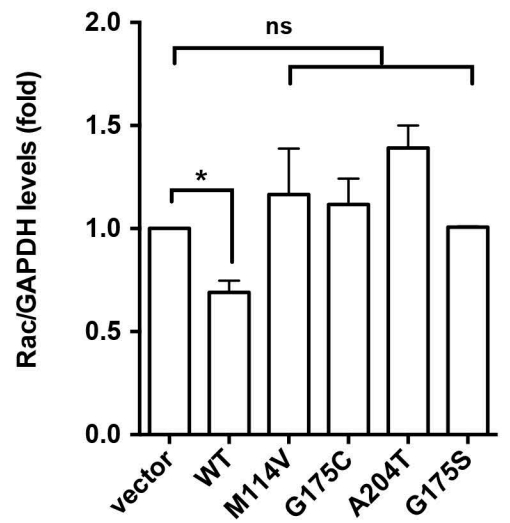

|                    |   |    |       |       |
|--------------------|---|----|-------|-------|
| <b>myc-HACE1</b>   | - | WT | G175S | G175N |
| <b>HA-Rac1Q61L</b> | + | +  | +     | +     |
| <b>His-ub</b>      | + | +  | +     | +     |

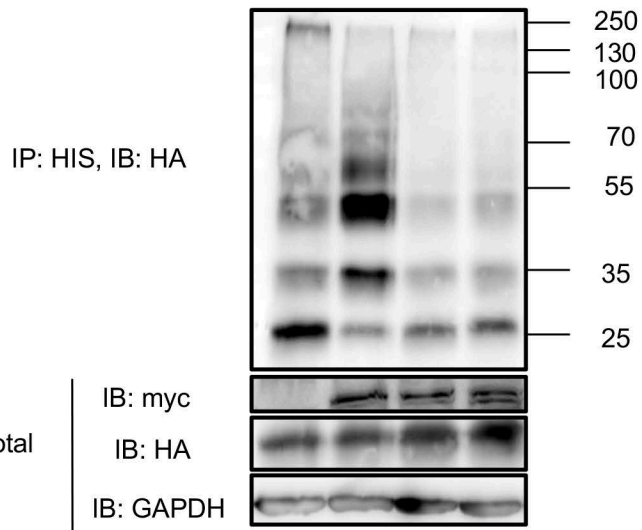



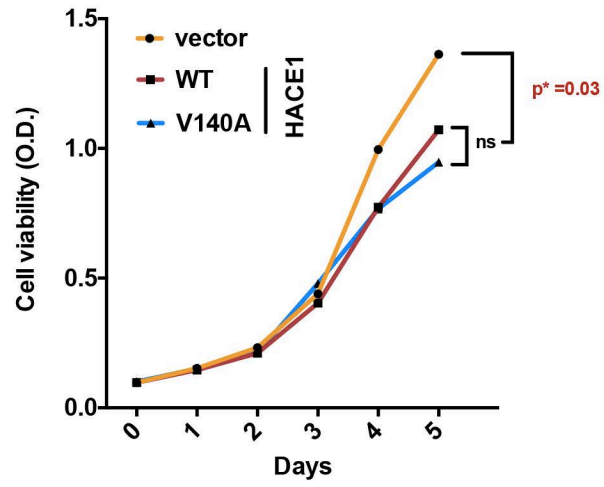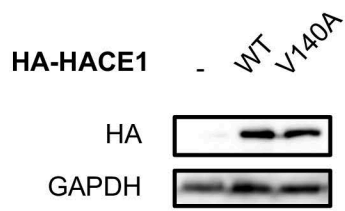

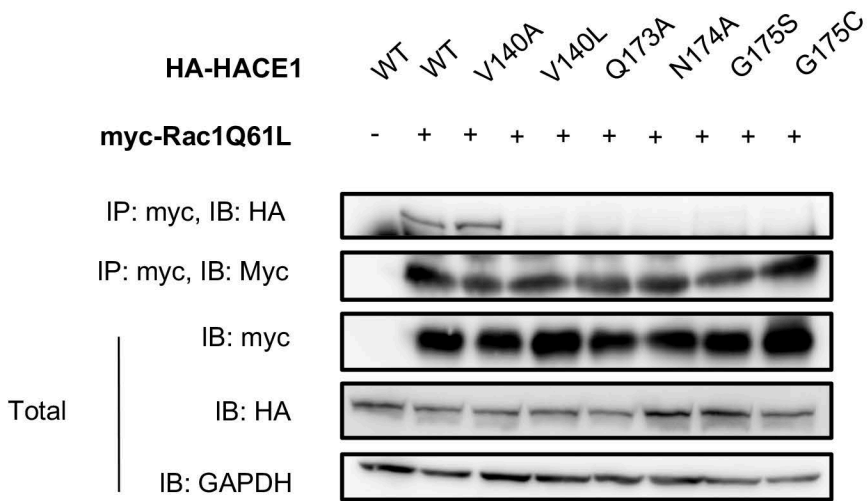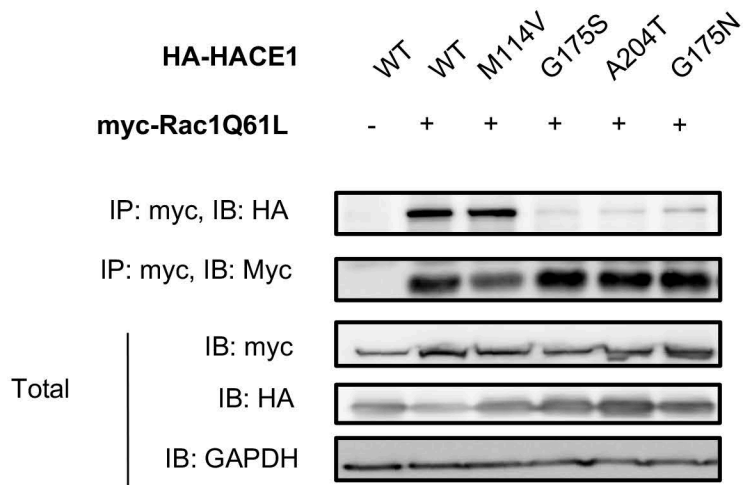

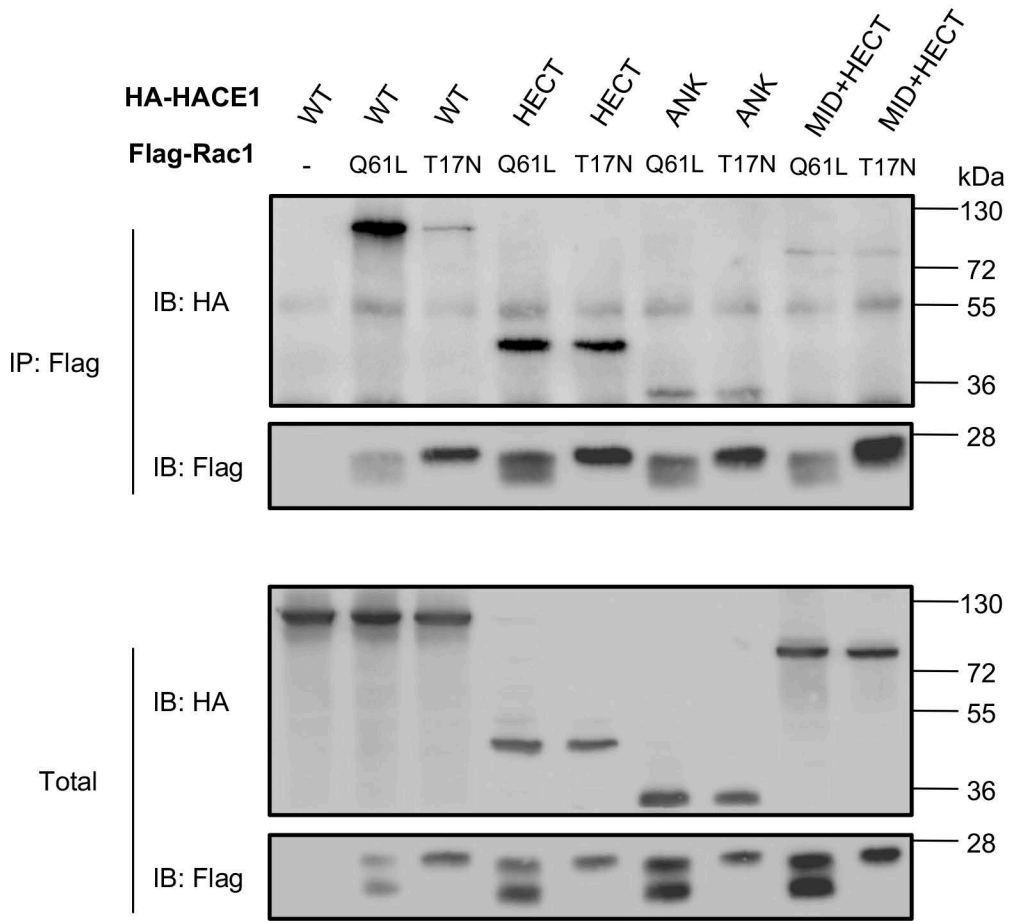

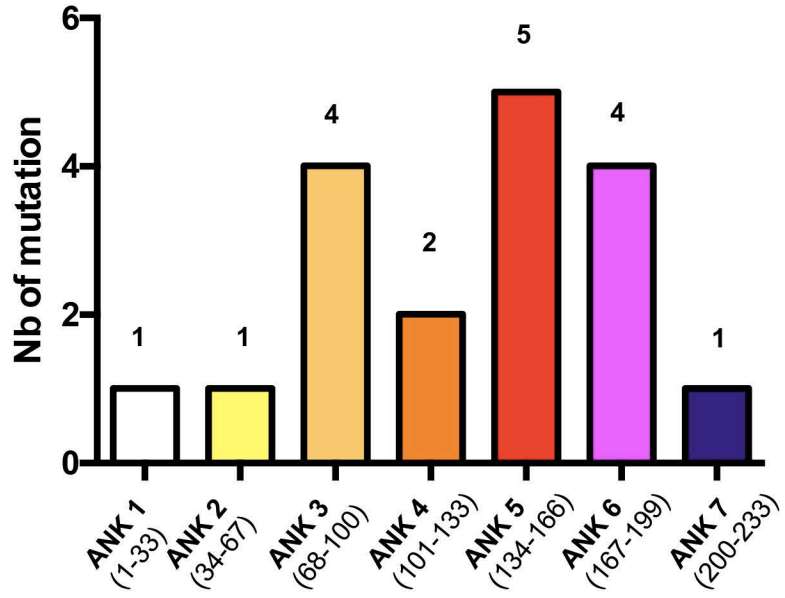

Supplement: srep44779-s1.pdf [file srep44779-s1.pdf]
